# Supplementary material
Source: HighWire-hosted journal article supplement (https://bmjopen.bmj.com/content/14/10/e086598)
Supplement: inline-supplementary-material-1 [file inline-supplementary-material-1.pdf]

Table S1. Search strategies according to bibliographic search engine

| Database                         | Search strategy                                                                                                                                                                                                                                                                                                                                                                                                                                                                                                                                                                                                                                                                                                                                                                                                                                                                                                                                | Search filters                                    |
|----------------------------------|------------------------------------------------------------------------------------------------------------------------------------------------------------------------------------------------------------------------------------------------------------------------------------------------------------------------------------------------------------------------------------------------------------------------------------------------------------------------------------------------------------------------------------------------------------------------------------------------------------------------------------------------------------------------------------------------------------------------------------------------------------------------------------------------------------------------------------------------------------------------------------------------------------------------------------------------|---------------------------------------------------|
| <b>AgeLine</b>                   | TX (eldercare OR “elder care” OR “elderly care” OR “eldercare provision” OR “elder care provision” OR “elderly care provision” OR “older carer” OR “older caregiver” OR “older care provider” OR “older provider of care” ) AND TX health AND TX ( app OR blog OR device OR forum OR “on-line support group” OR platform OR program OR record OR resource OR sensor OR service OR wearable)                                                                                                                                                                                                                                                                                                                                                                                                                                                                                                                                                    | Publication Year<br>Publication Type              |
| <b>PubMed</b>                    | (“elder care” OR “elderly care” OR “older carer” OR “older caregiver”) AND health AND (app OR blog OR device OR forum OR “on-line support group” OR platform OR program OR record OR resource OR sensor OR service OR wearable)                                                                                                                                                                                                                                                                                                                                                                                                                                                                                                                                                                                                                                                                                                                | Article<br>Language<br>Article<br>Type<br>Years   |
| <b>ScienceDirect</b>             | (“older carer” OR “older caregiver”) AND health AND (app OR device OR sensor OR wearable OR “on-line support group” OR platform)                                                                                                                                                                                                                                                                                                                                                                                                                                                                                                                                                                                                                                                                                                                                                                                                               | Article Type<br>Subject Area<br>Years             |
| <b>Scopus</b>                    | ALL("older carer" OR "older caregiver" OR "older care provider" OR "older provider of care" ) AND ALL( health ) AND ALL( app OR blog OR device OR forum OR sensor OR wearable OR "on-line support group" OR platform OR program OR record OR resource OR sensor OR service) AND PUBYEAR >2009 AND PUBYEAR <2024 AND (LIMIT-TO(SUBJAREA, "BIOC") OR LIMIT-TO(SUBJAREA, "COMP") OR LIMIT-TO(SUBJAREA, "ENGI" ) OR LIMIT-TO(SUBJAREA, "HEAL") OR LIMIT-TO(SUBJAREA, "IMMU") OR LIMIT-TO(SUBJAREA, "MEDI") OR LIMIT-TO(SUBJAREA, "MULT") OR LIMIT-TO (SUBJAREA, "NEUR") OR LIMIT-TO(SUBJAREA, "NURS") OR LIMIT-TO(SUBJAREA, "PHAR") OR LIMIT-TO(SUBJAREA, "PSYC") OR LIMIT-TO(SUBJAREA, "SOCI")) AND (LIMIT-TO(DOCTYPE, "ar") OR LIMIT-TO (DOCTYPE, "bk") OR LIMIT-TO (DOCTYPE , "ch") OR LIMIT-TO (DOCTYPE , "cp") OR LIMIT-TO (DOCTYPE , "re") OR LIMIT-TO (DOCTYPE , "sh")) AND (LIMIT-TO(LANGUAGE, "English") OR LIMIT-TO(LANGUAGE,"Italian")) | Document Type<br>Language<br>Subject Area<br>Year |
| <b>Social Sciences Abstracts</b> | eldercare OR “elder care” OR “elderly care” OR “eldercare provision” OR “elder care provision” OR “elderly care provision” OR                                                                                                                                                                                                                                                                                                                                                                                                                                                                                                                                                                                                                                                                                                                                                                                                                  | Publication Date<br>Source Types i.e.<br>Language |

|                       |                                                                                                                                                                                                                                                                                                                                                                                                                                                                                                                                                                                                                                                                                                                                                                                                                                                                                                                                                                                                                                                                                                                                                                                                                                                                                                                                                                                                                                                                                                                                                                           |                                                                      |
|-----------------------|---------------------------------------------------------------------------------------------------------------------------------------------------------------------------------------------------------------------------------------------------------------------------------------------------------------------------------------------------------------------------------------------------------------------------------------------------------------------------------------------------------------------------------------------------------------------------------------------------------------------------------------------------------------------------------------------------------------------------------------------------------------------------------------------------------------------------------------------------------------------------------------------------------------------------------------------------------------------------------------------------------------------------------------------------------------------------------------------------------------------------------------------------------------------------------------------------------------------------------------------------------------------------------------------------------------------------------------------------------------------------------------------------------------------------------------------------------------------------------------------------------------------------------------------------------------------------|----------------------------------------------------------------------|
|                       | “older carer” OR "older caregiver" OR “older care provider” OR “older provider of care” AND health AND app OR blog OR device OR forum OR “on-line support group” OR platform OR program OR record OR resource OR sensor OR service OR wearable                                                                                                                                                                                                                                                                                                                                                                                                                                                                                                                                                                                                                                                                                                                                                                                                                                                                                                                                                                                                                                                                                                                                                                                                                                                                                                                            |                                                                      |
| <b>SocINDEX</b>       | TX ( eldercare OR “elder care” OR “elderly care” OR “eldercare provision” OR “elder care provision” OR “elderly care provision” OR “older carer” OR "older caregiver" OR “older care provider” OR “older provider of care” ) AND TX health AND TX ( app OR blog OR device OR forum OR “on-line support group” OR platform OR program OR record OR resource OR sensor OR service OR wearable)                                                                                                                                                                                                                                                                                                                                                                                                                                                                                                                                                                                                                                                                                                                                                                                                                                                                                                                                                                                                                                                                                                                                                                              | Publication Date<br>Source Types i.e.<br>Language                    |
| <b>Web of Science</b> | (eldercare OR “elder care” OR “elderly care” OR “eldercare provision” OR “elder care provision” OR “elderly care provision” OR “older carer” OR "older caregiver" OR “older care provider” OR “older provider of care”) AND (health) AND (app OR blog OR device OR forum OR “on-line support group” OR platform OR program OR record OR resource OR sensor OR service OR wearable) (Topic) and 2010 or 2011 or 2013 or 2014 or 2015 or 2016 or 2017 or 2018 or 2019 or 2020 or 2021 or 2022 or 2023 (Publication Years) and Article or Proceeding Paper or Review Article or Book Chapters or Book or Book Review or Meeting Abstract or Early Access (Document Types) and English (Languages) and Public Environmental Occupational Health or Health Care Sciences Services or Geriatrics Gerontology or Nursing or General Internal Medicine or Medical Informatics or Computer Science or Engineering or Business Economics or Telecommunications or Social Sciences Other Topics or Robotics or Sociology or Social Issues or Rehabilitation or Biomedical Social Sciences or Education Educational Research or Psychiatry or Research Experimental Medicine or Science Technology Other Topics or Psychology or Social Work or Public Administration or Women S Studies or Family Studies or Neurosciences Neurology or Nutrition Dietetics or Pharmacology Pharmacy or Optics or Respiratory System or Otorhinolaryngology or Mathematical Methods In Social Sciences or Life Sciences Biomedicine Other Topics or Food Science Technology or Emergency Medicine or | Publication Years<br>Document<br>Types<br>Language<br>Research Areas |

|  |                                                                                                                                                                                                                                                                                                                                                                                                                                                                                                                                                                                                                                                                                                                                                                                |  |
|--|--------------------------------------------------------------------------------------------------------------------------------------------------------------------------------------------------------------------------------------------------------------------------------------------------------------------------------------------------------------------------------------------------------------------------------------------------------------------------------------------------------------------------------------------------------------------------------------------------------------------------------------------------------------------------------------------------------------------------------------------------------------------------------|--|
|  | Dermatology or Cardiovascular System<br>Cardiology or Oncology or Microbiology or<br>Urology Nephrology or Toxicology or<br>Demography or Cultural Studies or<br>Endocrinology Metabolism or Behavioral<br>Sciences or Communication or Radiology<br>Nuclear Medicine Medical Imaging or<br>Biochemistry Molecular Biology or<br>Mathematical Computational Biology or<br>Instruments Instrumentation or Information<br>Science Library Science or Sport Sciences or<br>Automation Control Systems or<br>Biotechnology Applied Microbiology or<br>Infectious Diseases or Dentistry Oral Surgery<br>Medicine or Surgery or Imaging Science<br>Photographic Technology or Anthropology or<br>Medical Ethics or Ethnic Studies or Area<br>Studies or Mathematics (Research Areas) |  |
|--|--------------------------------------------------------------------------------------------------------------------------------------------------------------------------------------------------------------------------------------------------------------------------------------------------------------------------------------------------------------------------------------------------------------------------------------------------------------------------------------------------------------------------------------------------------------------------------------------------------------------------------------------------------------------------------------------------------------------------------------------------------------------------------|--|
